# Supplementary material for: Immortal Ring-Opening Polymerization of rac-Lactide Using Polymeric Alcohol as Initiator to Prepare Graft Copolymer
Source: MDPI journal article supplement (doi:10.3390/polym8010017), 2016-01-15
Supplement: s1 [file s1]

# Supplementary Materials: *Immortal* Ring-Opening Polymerization of *rac*-Lactide Using Polymeric Alcohol as Initiator to Prepare Graft Copolymer

Na Liu, Bo Liu, Changguang Yao and Dongmei Cui

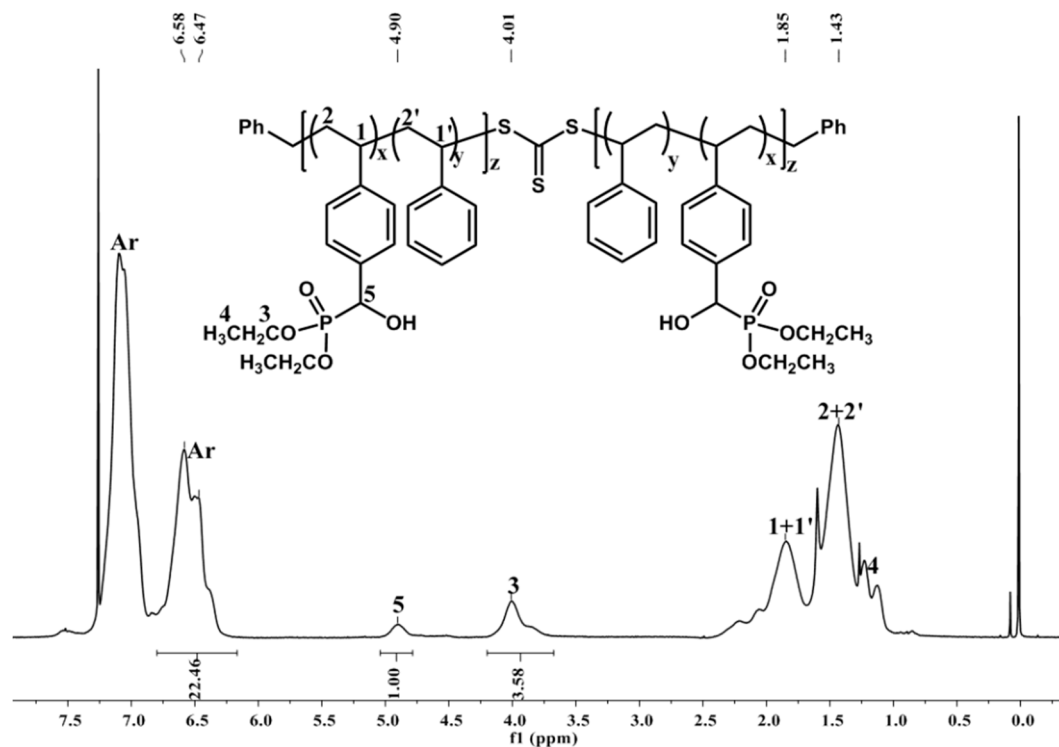

Figure S1.  $^1\text{H}$  NMR spectrum (400 MHz,  $\text{CDCl}_3$ , 298 K) of the PS-OH ( $M_n = 8800 \text{ g}\cdot\text{mol}^{-1}$ , PDI = 1.14).

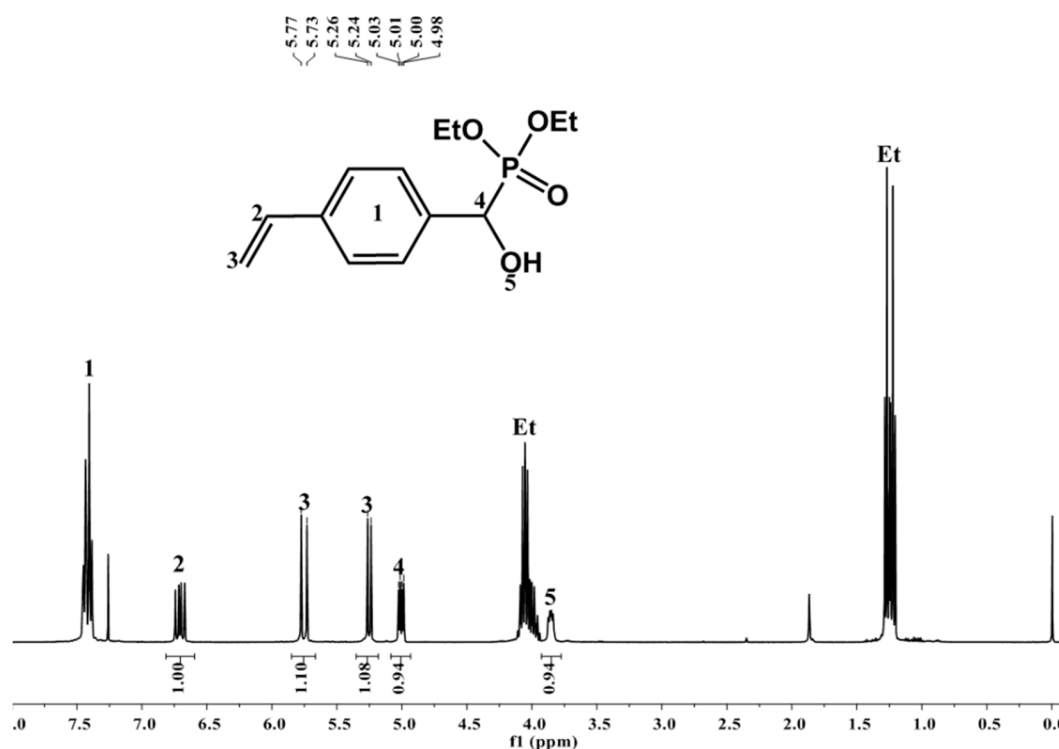

Figure S2.  $^1\text{H}$  NMR spectrum (400 MHz,  $\text{CDCl}_3$ , 298 K) of the St-OH.

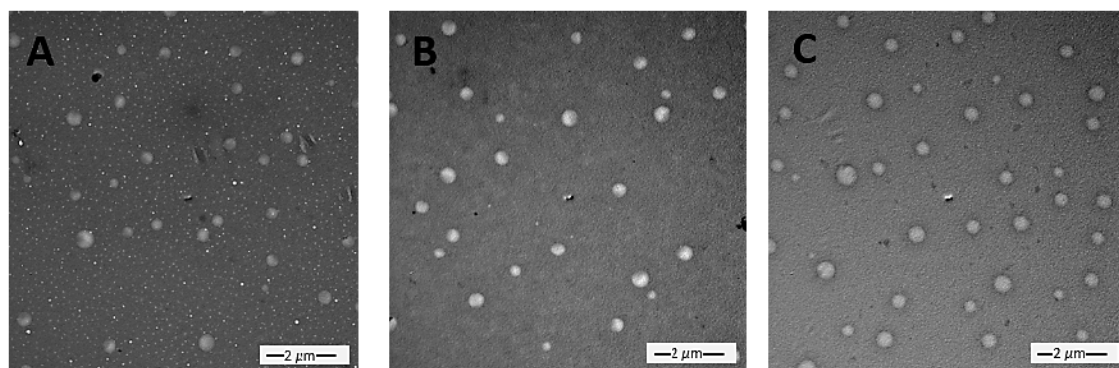

**Figure S3.** TEM images of the PS-g-PLA with different graft lengths after etching: (A) PS<sub>8.6</sub>-g-PLA<sub>5</sub> (Table 2, entry 5); (B) PS<sub>8.6</sub>-g-PLA<sub>10</sub> (Table 2, entry 2); (C) PS<sub>8.6</sub>-g-PLA<sub>20</sub> (Table 2, entry 6). Conditions: accelerating voltage: 100 kV; amplification factor: 15,000.

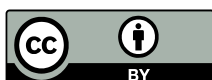

© 2016 by the authors; licensee MDPI, Basel, Switzerland. This article is an open access article distributed under the terms and conditions of the Creative Commons by Attribution (CC-BY) license (<http://creativecommons.org/licenses/by/4.0/>).
